# Supplementary material
Source: Springer Nature journal article supplement (https://www.springermedizin.de/resource/supplementary/13012_2007_99_MOESM1_ESM.pdf/9629240)
Supplement: MOESM1 [file 9629240]

Contracts and Bids  
Disease Management  
Prior Authorization  
Outcomes Assessment

Enhanced  
Reimbursement,  
Training and  
CEUs

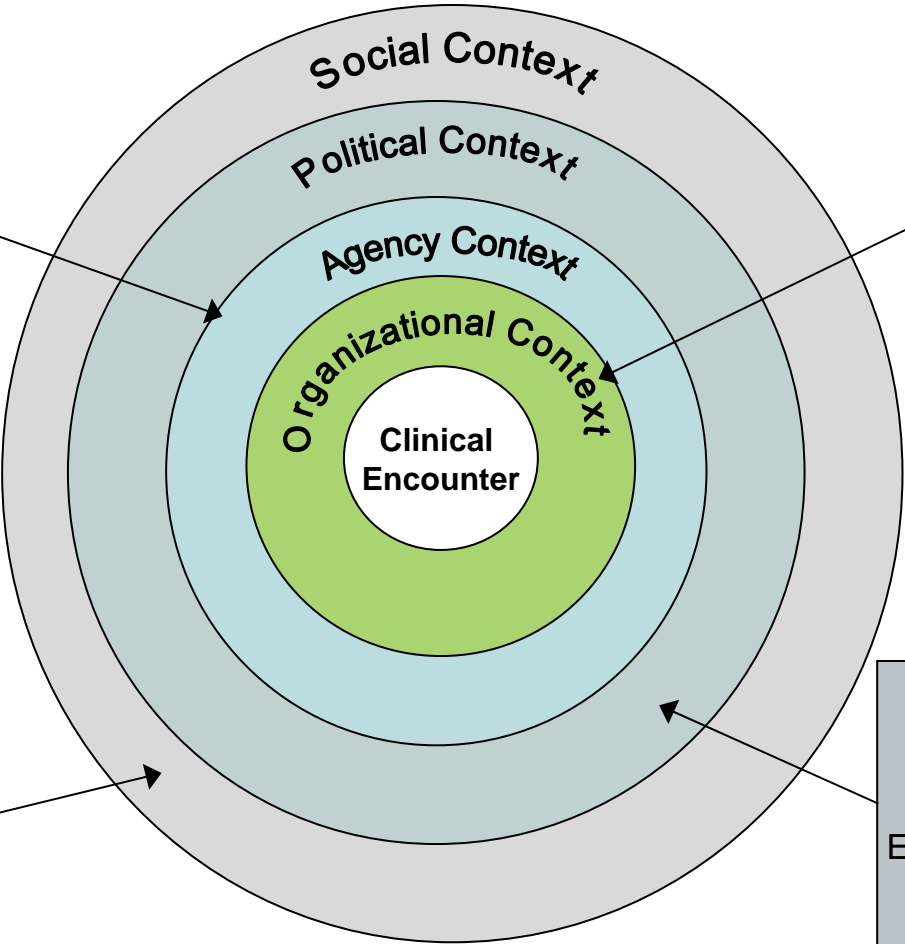

Stigma

EBP Legislation  
Parity Laws  
Loan Forgiveness  
Eliminating Structural Stigma  
Consumer Involvement
